# Supplementary material for: Microbe transmission from pet shop to lab-reared zebrafish reveals a pathogenic birnavirus
Source: PubMed Central journal article supplement — bioRxiv. 2023 Aug 28:2023.08.28.555169. Preprint. [Version 1] doi: 10.1101/2023.08.28.555169 (PMC10491165; doi:10.1101/2023.08.28.555169), 2023-08-28
Supplement: media-4.pdf [file media-4.pdf]

A

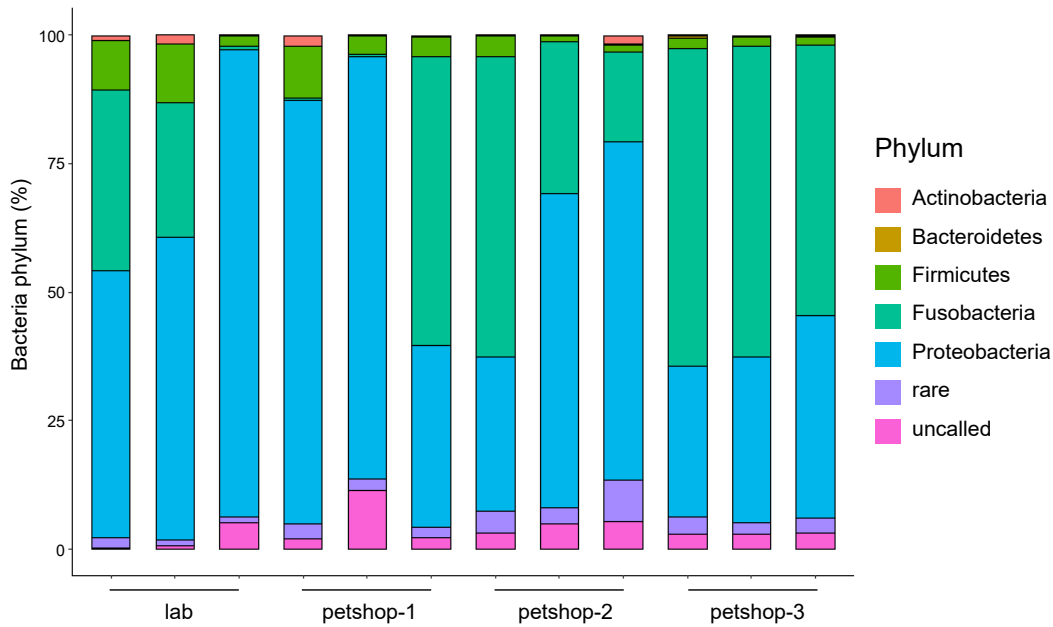

B

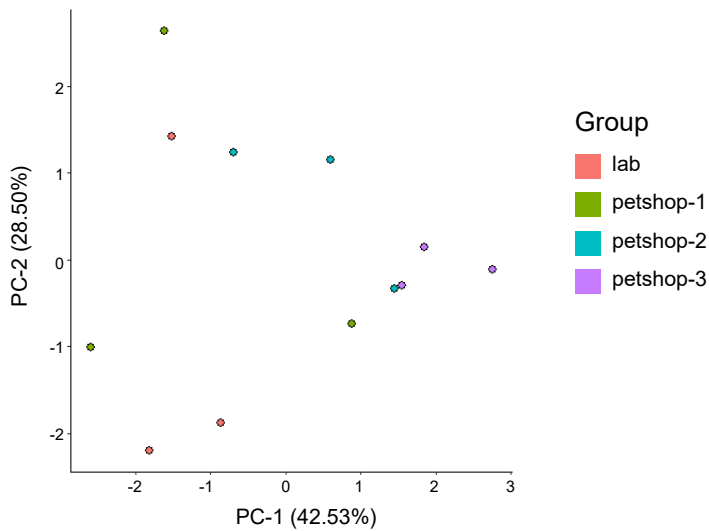

**Supplemental file 4 Gut microbiome composition of lab and pet store zebrafish.** A) bar graphs illustrating bacteria relative abundance by phylum. Relative abundance was calculated from normalized read counts from each sample. Each column represents an individual fish intestine sample. N = 3 for each group. Note large degree of variation between individuals and between groups. B) Principal component analysis using relative abundances of each bacteria phylum per individual zebrafish. PC-1 and PC-2 combined account for ~ 70% of variation between samples. Note large variation within and between groups. Small sample size per group (n = 3) prevented us from plotting a 95% confidence ellipse for each group. A & B) generated with ggplot2 in R studio.
